# Supplementary material for: Picturing Recovery: A Photovoice Exploration of Recovery Dimensions Among People With Serious Mental Illness
Source: Atypon-hosted journal article supplement (doi:10.1176/appi.ps.201200503), 2013-06-03
Supplement: 837_ds001.pdf [file 837_ds001.pdf]

**Photovoice Project Details: Weekly Themes and Group Dialogue Protocol****Weekly Themes by Site**

| Week   | Site A                                                     | Site B                                                    |
|--------|------------------------------------------------------------|-----------------------------------------------------------|
| Week 1 | Introduction: No theme                                     | Introduction: No theme                                    |
| Week 2 | What you do to stay healthy?                               | What you do to stay healthy?                              |
| Week 3 | Things that are necessary to keep me alive                 | Energy/motivation: How it impacts health & wellness       |
| Week 4 | Role of the community in supporting my health              | Your typical diet and how it related to health & wellness |
| Week 5 | Achievements in my health and wellness                     | Forgiveness in health and wellness                        |
| Week 6 | How does culture/diversity impact your health and wellness | Health and Fitness                                        |

**Group Dialogue Protocol:**

We use the recommended S-H-O-W-E-D questions to guide group dialogues which is standard procedure in photovoice projects (14). This refers to a group process where participants are prompted to think about the following: “(1) What do you SEE in this photograph? (2) What’s HAPPENING in this photograph? (3) How does this relate to OUR lives? (4) WHY do these issues exist? (5) How can we become more EMPOWERED or ACTIVE by understanding this issue? and (6) What can we DO to address this issue?”

Photo: "Security"

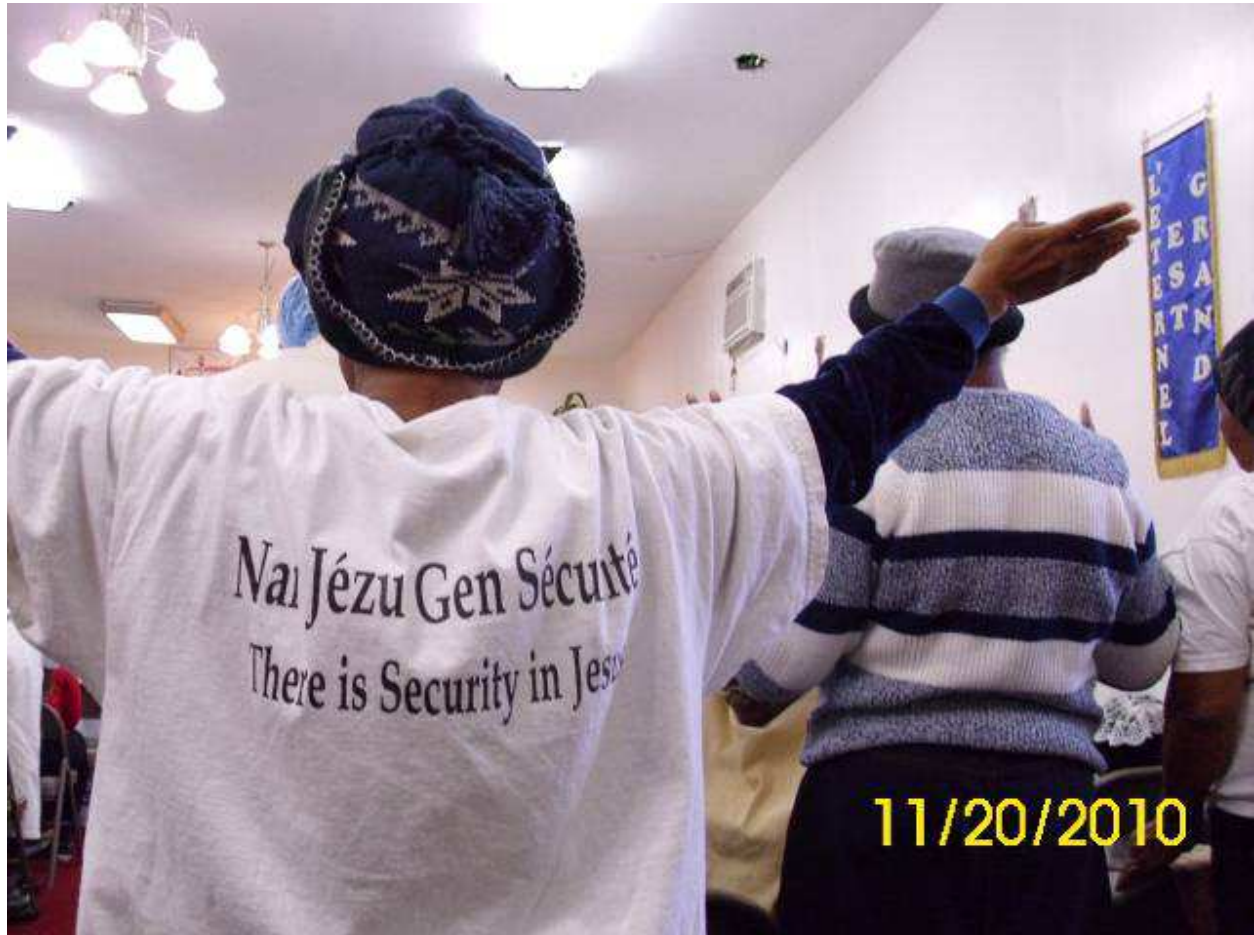

**Interviewer:** Why do you want to share this photo?

**Participant:** I share it because of my belief in Jesus. I grew up as a Catholic and then I switched to Pentecostal. So every time I have a problem I call on him, he always gives direction you know, on what to do even like if I do something . . . he always forgive me . . .

**Interviewer:** What's the story this photo tells?

**Participant:** It was a confession of sins. You want God to forgive you. You open your arms just how you are and he accepts you . . . It relates because like it opens me up, when you keep something inside of you, if something hurts inside of you . . . and you refuse to let go of that hurt that somebody committed to you, you get sick . . . physically you have a grudge, you still hold a grudge against that person, you are not completely yourself because every time you see the person you need to feel . . . If you forgive that person you just let go . . .

**Interviewer:** What title would you give this photo?

**Participant:** Security, because when you're praying and after you finish praying you feel at ease you feel good . . . a lot . . . like I was saying to you, it's like a charger.

Photo: "My Baby"

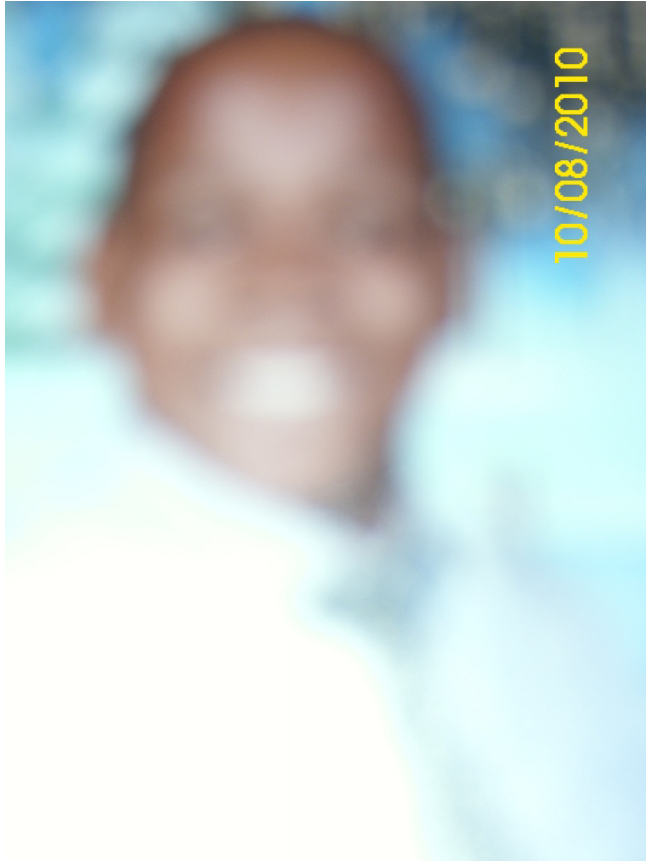

**Participant:** He is my real inspiration. I don't have him with me because of some b.s. and so we are struggling . . . he is struggling to get to me and I'm struggling to get him back to me . . . That's my heart . . . I do anything in the world for my son.

**Interviewer:** What's the story this photo tells?

**Participant:** This is a picture I took of him when he graduated 6<sup>th</sup> grade . . . he is telling me Dad, I'm doing it, I can do it . . . getting his education, not doing things he's not supposed to be doing, you know even though I've done it when I was young, but my inspiration for him is to get his education, to achieve what he wants in life, don't be like me, be better. He is my inspiration for me not using drugs, not drinking . . . because I remember the time when I was using drugs and this is life . . . I brought life into this world so that stops me from doing everything that I used to do . . . not to do it anymore . . . Through him I stay healthy, I eat, I sleep, I work part-time . . . On Thursday's I go see him and I be glad to go see him . . . And for me to, he could be a role model, to a point . . . when something is not right, I can sit down, he says Dad come on sit down let's talk about it, we discuss our issues or my issues and he says well Dad maybe you should try this way or don't go that way go this way and that way you ain't get in no trouble. I'm an inspiration to him but he is more of an inspiration to me because he makes me see things I normally wouldn't see or by the time I saw it, it would be too late.
